# Supplementary material for: The Comparative Analysis of Genomic Diversity and Genes Involved in Carbohydrate Metabolism of Eighty-Eight Bifidobacterium pseudocatenulatum Isolates from Different Niches of China
Source: Nutrients. 2022 Jun 4;14(11):2347. doi: 10.3390/nu14112347 (PMC9183100; doi:10.3390/nu14112347)
Supplement: Supplementary file 1 [file nutrients-14-02347-s001.zip]

Archive with 7 entries (7 files):
- Figure S1.jpg
- Figure S2.jpg
- Figure S3.jpg
- Figure S4.jpg
- Figure S5.jpg
- Supplementary Material.pdf
- Supplementary Material.xlsx
