# Supplementary material for: The Comparative Analysis of Genomic Diversity and Genes Involved in Carbohydrate Metabolism of Eighty-Eight Bifidobacterium pseudocatenulatum Isolates from Different Niches of China
Source: Nutrients. 2022 Jun 4;14(11):2347. doi: 10.3390/nu14112347 (PMC9183100; doi:10.3390/nu14112347)
Supplement: Supplementary file 1 [file nutrients-14-02347-s001.zip › Supplementary Material.xlsx]

## Sheet: Table S1.
Table S1. General genomic features 88 of B. pseudocatenulatum strains in this study
Strain		Region	Origin	Age(year)		Sex		Genome Size(bp)		GC content (%)		No. of ORF		ORF / Genome (%)		No. of tRNA	Accession No.	Reads	contigs	N50	L50
A13		Huazhong	Human	108		Female		2477035		56.817		2155		85.89		55	SRR10350761	4452815*2	48	219574	3
A14		Huazhong	Human	95		Female		2180604		56.67		1907		86.77		54	SRR10350760	3657471*2	30	164673	3
FAHBZ2M3		Huadong	Human	80		Female		2157897		56.22		1833		86.64		54	SRR10350749	3826231*2	38	150358	4
FAHBZ9L5		Huadong	Human	3		Male		2517672		56.514		2348		84.01		55	SRR10350738	3500295*2	544	16513	40
FAHWH24M2		Huadong	Human	54		Male		2238859		56.442		2017		87.08		52	SRR10350727	3537923*2	35	209012	4
FFJND17M1		Huadong	Human	0.25		Male		1981698		56.329		1835		83.68		41	SRR10350726	3705396*2	579	11569	47
FFJND7M3		Huadong	Human	0.08		Male		2240851		56.56		1957		87.02		55	SRR10350725	3702808*2	33	252883	4
FFJNDD5M3		Huadong	Human	38		Female		2214240		56.334		1837		86.56		54	SRR10350724	4650668*2	26	579923	2
FFJNDD6M2		Huadong	Human	24		Male		2236097		56.337		1893		86.17		54	SRR10350723	4003397*2	33	588183	2
FGSYC11M1		Xibei	Human	74		Female		2275539		56.863		1986		86.79		53	SRR10350722	3333334*2	38	197999	5
FGSYC12M4		Xibei	Human	84		Female		2194505		56.496		1900		86.43		57	SRR10350759	3333334*2	37	147305	5
FGSYC13M1		Xibei	Human	66		Female		2240246		56.149		1965		85.54		57	SRR10350758	3333334*2	50	126588	6
FGSYC18M1		Xibei	Human	67		Female		2211578		56.464		1911		85.67		54	SRR10350757	3333334*2	42	184486	5
FGSYC36M3		Xibei	Human	56		Male		2189591		56.382		1862		87.05		56	SRR10350756	3333334*2	27	528972	2
FGSYC39M1		Xibei	Human	53		Male		2247508		56.47		1992		87.13		54	SRR10350755	3333334*2	18	313196	3
FGSYC3M2		Xibei	Human	65		Female		2206672		56.315		1972		87.32		56	SRR10350754	4364921*2	30	227581	3
FGSYC43M1		Xibei	Human	55		Female		2395775		56.64		2155		86.02		60	SRR10350753	3049639*2	58	144041	6
FGSYC4M2		Xibei	Human	75		Female		2135697		56.307		1811		86.53		54	SRR10350752	4489929*2	32	197343	4
FGSYC5M4		Xibei	Human	55		Female		2177376		56.15		1880		87.02		55	SRR10350751	4295641*2	27	275643	4
FGSYC6M1		Xibei	Human	65		Female		2297460		56.716		2008		85.59		55	SRR10350750	4791588*2	49	284488	3
FGSYC76M7		Xibei	Human	17		Female		2458900		56.22		2139		85.54		66	SRR10350748	3486663*2	38	173661	6
FGSYC7M5		Xibei	Human	57		Male		2214515		56.365		1917		87		57	SRR10350747	4133330*2	33	173294	3
FGSYC87M1		Xibei	Human	18		Male		2201294		56.546		1959		87.62		54	SRR10350746	3333334*2	21	320495	3
FGSYC88M3		Xibei	Human	17		Male		2171353		56.712		1872		87.6		58	SRR10350745	2920454*2	14	827074	2
FGSYC91M2		Xibei	Human	17		Male		2129259		56.403		1874		87.5		55	SRR10350744	3333334*2	33	542734	2
FGSZY20M1		Xibei	Human	3		Female		2164853		56.507		1888		86.22		52	SRR10350743	5581807*2	61	142970	4
FGSZY50M3		Xibei	Human	13		Male		2230726		56.405		1870		86.41		55	SRR10350742	3557991*2	25	485101	2
FGZ21I1M2		Huanan	Human	0.02		Female		2236807		56.242		1906		86.78		56	SRR17228462	4179067*2	50	113650	7
FGZ39I1M3		Huanan	Human	0.02		Male		2245479		56.444		1928		85.96		54	SRR17228463	4778729*2	40	231423	4
FHeNJZ10M1		Huazhong	Human	0.5		Male		2265888		56.542		2022		87.13		57	SRR17228459	3799427*2	34	168934	3
FHNFQ13M2		Huazhong	Human	15		Female		2255611		56.332		1965		87.22		55	SRR10350741	3489241*2	49	173606	3
FHNFQ32M1		Huazhong	Human	2		Female		2231872		56.407		1975		87.6		57	SRR17228455	3726732*2	42	400797	2
FHNFQ3M1		Huazhong	Human	27		Female		2203012		56.524		1861		86.57		53	SRR10350740	3815575*2	32	536206	2
FHNXY11M4		Huazhong	Human	3		Female		2151698		56.256		1908		87.05		55	SRR17228458	3884955*2	49	123755	5
FHNXY15M2		Huazhong	Human	2.5		Female		2215934		56.405		1907		85.86		53	SRR10350739	3288445*2	35	142332	3
FHNXY46M4		Huazhong	Human	81		Female		2159250		56.22		1838		85.97		56	SRR10350737	3774093*2	44	136969	6
FHuNa40M1		Huazhong	Human	3		Female		2214264		56.508		1895		85.85		56	SRR17228476	5076587*2	46	106123	6
FHuNHHMY19M3		Huazhong	Human	47		Female		2295971		56.333		2008		86.44		53	SRR17228460	3416148*2	55	199474	3
FHuNHHMY38M4		Huazhong	Human	2.5		Female		2185517		56.365		1845		86.11		56	SRR17228461	3456963*2	25	251651	3
FHuNHHMY42M3		Huazhong	Human	3.5		Female		2166488		56.29		1854		87.19		54	SRR17228464	3720761*2	53	172046	3
FHuNHHMY76M7		Huazhong	Human	3		Male		2298797		56.486		1982		85.87		48	SRR17228475	5491386*2	40	218153	4
FHuNMY10M3		Huazhong	Human	87		Female		2231396		56.438		1912		86.38		55	SRR10350736	3585157*2	48	119696	6
FHuNMY37M1		Huazhong	Human	21		Male		2265712		56.201		1898		85.9		52	SRR10350735	3716056*2	45	200763	4
FJLHD2M3		Dongbei	Human	48		Female		2205836		56.526		1938		87.84		55	SRR10350734	2700568*2	41	173345	4
FJLHD33M2		Dongbei	Human	60		Female		2240454		56.331		1934		86.3		56	SRR10350733	4386814*2	35	231623	4
FJLHD45M1		Dongbei	Human	50		Female		2209817		56.532		1936		87.89		48	SRR10350732	4456571*2	41	207464	3
FJLHD4M2		Dongbei	Human	56		Male		2195764		56.293		1941		87.18		58	SRR10350731	4456319*2	28	315966	3
FJSNT36M3		Huadong	Human	89		Female		2238393		56.537		1898		86.27		57	SRR10350730	5221943*2	35	173530	5
FJSNT37M5		Huadong	Human	88		Female		2245468		56.53		1966		86.77		54	SRR10350729	4651092*2	35	281180	3
FJSSZ4M1		Huadong	Human	0.67		Female		2270885		56.383		1925		85.87		56	SRR17228465	3981765*2	34	562910	2
FJSZJ4M5		Huadong	Human	0.5		Male		2191301		56.437		1877		86.22		55	SRR17228466	4840971*2	30	623919	2
FNMHLBE12M7		Xibei	Human	8		Male		2237771		56.386		1910		86.79		55	SRR10350728	5325528*2	46	142200	3
FNXHL2M3		Xibei	Human	1.5		Male		2146254		56.59		1840		86.39		55	SRR10351549	4158893*2	40	159172	5
FNXHL5M2		Xibei	Human	13		Female		2186616		56.303		1909		86.82		54	SRR10351548	3912102*2	47	132520	5
FNXYCHL12M2		Xibei	Human	43		Female		2177832		56.289		1906		86.67		57	SRR10351537	5014119*2	53	249943	4
FNXYCHL73M1		Xibei	Human	1.5		Male		2212967		56.506		1849		86.01		54	SRR17228467	3738970*2	59	180786	5
FQHXN112M3		Xibei	Human	37		Female		2319984		56.231		2015		85.83		52	SRR10351530	4474788*2	45	428807	3
FQHXN24M1		Xibei	Human	1.8		Female		2203853		56.311		1919		86.6		61	SRR17228468	3764949*2	41	217885	3
FQHXN3M8		Xibei	Human	36		Male		2305958		56.469		1993		86.33		53	SRR10351529	4880638*2	73	160687	5
FQHXN5M4		Xibei	Human	34		Female		2238090		56.634		1978		86.41		58	SRR10351528	4930217*2	34	165439	4
FQHXN6M4		Xibei	Human	73		Male		2203803		56.421		1840		86.86		55	SRR10351527	5097809*2	23	1139830	1
FQHXN72M4		Xibei	Human	43		Female		2158552		56.507		1842		86.15		55	SRR10351526	4082553*2	24	317933	3
FQHXN83M4		Xibei	Human	37		Male		2326936		56.256		2086		87.27		63	SRR10351525	5067674*2	29	647938	2
FQHXN8M3		Xibei	Human	40		Male		2308388		56.597		2032		86.14		57	SRR10351524	4881770*2	35	177127	4
FSCDJY7M1		Xinan	Human	35		Female		2289347		56.234		1936		85.79		48	SRR17228469	5167226*2	61	142004	5
FSCPS14M2		Xinan	Chicken	/		/		2278111		56.515		1969		86.08		53	SRR10351547	3782862*2	49	143634	6
FSDWF3M4		Huabei	Human	0.2		Male		2128625		56.382		1866		86.72		54	SRR10351546	3565429*2	48	103034	5
FSHXXA2M9		Xibei	Human	0.29		Male		2306304		56.41		1980		84.69		53	SRR10351545	3601154*2	244	66816	12
FXJKS15M4		Xibei	Human	70		Female		2253196		56.512		1978		86.52		53	SRR10351544	4291516*2	38	203675	5
FXJSW36M4		Xibei	Human	24		Female		2188532		56.224		1944		87.07		55	SRR17228470	3626026*2	51	112748	5
FXJWS24M3		Xibei	Human	45		Female		2475076		56.313		2227		84.29		68	SRR10351543	3758366*2	143	294700	3
FXJWS49M33		Xibei	Human	35		Female		2156076		56.505		1915		87.12		57	SRR10351542	3786698*2	52	111783	6
FYNDL22M6		Xinan	Cow	/		/		2105392		56.642		1846		87.12		55	SRR10351541	3616049*2	46	124309	3
FYNLJ23M6		Xinan	Human	66		Female		2274284		56.583		1944		86.16		55	SRR10351540	3590125*2	45	137920	5
FYNLJ4M1		Xinan	Human	54		Female		2155044		56.17		1885		87.56		57	SRR17228472	4614497*2	31	164888	3
FZJHZ1M1		Huadong	Human	0.02		Male		2745943		55.968		2674		84.68		60	SRR10351539	5048387*2	732	10895	58
FZJHZD11M4		Huadong	Human	10		Female		2369300		56.823		2055		85.88		55	SRR10351538	3726678*2	65	108312	7
FZJHZD4M6		Huadong	Human	2		Female		2203660		56.396		1882		86.52		58	SRR17228471	5201787*2	31	220914	4
Hube15M3		Huazhong	Human	27		Male		2142250		56.374		1875		86.65		56	SRR17228456	3740875*2	47	130617	5
HuNa38		Huazhong	Human	4		Male		2253877		56.312		1930		85.63		55	SRR10351536	3484165*2	48	153114	5
HuNan_2016		Huazhong	Human	92		Male		2223876		56.526		1924		85.55		58	SRR10351535	4640979*2	81	158406	5
HuNan14M4		Huazhong	Human	90		Male		2220841		56.176		1890		85.67		55	SRR17228474	3587114*2	53	98242	7
HuNan41M8		Huazhong	Human	3		Female		2240577		56.252		2013		87.36		53	SRR17228473	4429190*2	44	173638	3
NT17		Huadong	Human	79		Female		2224371		56.313		1930		87.77		57	SRR10351534	3799879*2	53	471081	2
NT52		Huadong	Human	79		Female		2260287		56.684		1931		85.95		59	SRR17228457	3750486*2	56	316290	3
U2		Huabei	Human	0.008		Female		2303685		56.618		1986		85.95		54	SRR10351533	3561111*2	41	203354	3
V6		Huabei	Human	0.005		Female		2208788		56.21		2003		88.11		56	SRR10351532	3873029*2	44	182952	4
XZ28R1		Xinan	Human	60		Male		2330052		56.402		2057		86.13		58	SRR10351531	3874999*2	47	171125	4

## Sheet: Table S2.
Table S2. Animal grouping and treatment
Group	Mice number	1 week	treatment
			3 week	4th week
Control	6	Adaptation	10% skimmed milk.	Adaptation
A14	6	Adaptation	A14 (10% skimmed milk, v/v)	Adaptation
FFJND17M1	6	Adaptation	FFJND17M1 (10% skimmed milk, v/v)	Adaptation
FQHXN83M4	6	Adaptation	FQHXN83M4 (10% skimmed milk, v/v)	Adaptation
FFJNDD6M2	6	Adaptation	FFJNDD6M2 (10% skimmed milk, v/v)	Adaptation
FHNXY15M2	6	Adaptation	FHNXY15M2 (10% skimmed milk, v/v)	Adaptation
FNXHL2M3	6	Adaptation	FNXHL2M3 (10% skimmed milk, v/v)	Adaptation
FJSNT37M5	6	Adaptation	FJSNT37M5 (10% skimmed milk, v/v)	Adaptation
FSHXXA2M9	6	Adaptation	FSHXXA2M9 (10% skimmed milk, v/v)	Adaptation
FAHBZ9L5	6	Adaptation	FAHBZ9L5 (10% skimmed milk, v/v)	Adaptation
FFJND7M3	6	Adaptation	FFJND7M3 (10% skimmed milk, v/v)	Adaptation
FGSYC12M4	6	Adaptation	FGSYC12M4 (10% skimmed milk, v/v)	Adaptation
FHuNMY10M3	6	Adaptation	FHuNMY10M3 (10% skimmed milk, v/v)	Adaptation

## Sheet: Table S3.
Table S3. General genomic features 13 of Bifidobacterium strains in this study
Strain	Origin	Region	Genome Size (M bp)	GC%	No. of ORF	Accession no.
B. pseudocatenulatum JCM1200	Human	Japan	2.31	56.4	1744	GCA_001025215.1
B. pseudocatenulatum 12	Human	South Korea	2.19	56.5	1655	GCA_003952825.1
B. pseudocatenulatum IPLA36007	Human	Spain	2.33	56.3	1790	GCA_000708005.1
B.catenulatum APCKJ1	Human	Ireland	2.45	56.2	1949	GCA_009684555.1
B.catenulatum DSM16992	Human	Japan	2.08	56.2	1608	GCA_001025195.1
B.catenulatum JCM15439	Human	/	2.34	56.3	1848	GCA_001042615.1
B.catenulatum MGYG_HGUT_01490	Human	/	2.08	56.2	1613	GCA_902381755.1
B.adolescentis 1_11	Human	China	2.19	59.6	1741	GCA_003030905.1
B.adolescentis 6	Human	South Korea	2.2	59.3	1726	GCA_003429385.1
B.adolescentis 22L	Human	Italy	2.2	59.3	1711	GCA_000737885.1
B.adolescentis BBMN23	Human	China	2.17	59.3	1693	GCA_000817995.1
B.adolescentis P2P3	Human	South Korea	2.2	59.4	1717	GCA_003856735.1
B.adolescentis ZJ2	Human	China	2.4	59.9	1930	GCA_009832825.1
